# Supplementary material for: Effect of a halogenide substituent on the stability and photophysical properties of lanthanide triple-stranded helicates with ditopic ligands derived from bis(benzimidazolyl)pyridine †
Source: Royal Society of Chemistry journal article supplement (doi:10.1039/b001818j), 2000-01-01
Supplement: b001818j.doc [file b001818j.doc]

**Effect of a halogenide substituent on the stability and photophysical properties of lanthanide triple-stranded helicates with ditopic ligands derived from bis(benzimidazole)pyridine**

**_______________________________________________________**

**Carlos Platas Iglesias,a Mourad Elhabiri,a Marcel Hollenstein,a Jean-Claude G. Bünzli,a and Claude Piguetb**

*a Institute of Inorganic and Analytical Chemistry, BCH, University of Lausanne, CH-1015 Lausanne, Switzerland*

*b Department of Inorganic, Analytical and Applied Chemistry, University of Geneva, 30 quai E. Ansermet, CH-1211 Geneva 4, Switzerland.*

###### **Supporting Information**

(5 pages)

## Table S1 Analyticala and IR data (cm-1) for [Ln2(LE)3](ClO4)6nH2O

| Ln | n | %C | %H | %N | (ClO4-) | (C=O) | ClO4- |
| --- | --- | --- | --- | --- | --- | --- | --- |
| La | 10 | 42.3 (43.5) | 4.5 (4.5) | 10.4 (10.4) | 1099 | 1585 | 624 |
| Eu | 10 | 42.8 (43.1) | 4.4 (4.6) | 10.2 (10.3) | 1092 | 1586 | 624 |
| Eu | 0 | 44.9 (45.7) | 4.3 (4.1) | 10.8 (10.9) | 1095 | 1589 | 623 |
| Gd | 4 | 44.5 (44.5) | 4.3 (4.3) | 10.6 (10.6) | 1087 | 1589 | 625 |
| Tb | 7 | 43.6 (43.7) | 4.4 (4.4) | 10.4 (10.5) | 1092 | 1586 | 624 |
| Lu | 8 | 42.9 (43.0) | 4.5 (4.4) | 10.3 (10.3) | 1087 | 1589 | 626 |

a Calculated values within parentheses

**Table S2.** Contact and dipolar shifts (ppm) for [Ln2(LE)3]6+ in CD3CN computed according to Reilley’s method (eqs 5 and 6).

|  |  | Pr | Nd | Eu | Tb | Dy | Ho | Er | Tm | Yb |
| --- | --- | --- | --- | --- | --- | --- | --- | --- | --- | --- |
| b-CH2 |  | 0.14  1.11 | 0.22  0.42 | -0.37  -0.40 | -1.56  8.69 | -1.40  10.1 | 1.81  2.57 | 1.23  -2.18 | 0.66  -3.50 | 0.21  -1.45 |
| H4’ |  | 0.68  12.87 | 1.02  4.91 | -1.74  -4.68 | -7.33  100.62 | -6.57  117.00 | 2.26  28.47 | 1.54  -24.09 | 0.82  -38.69 | 0.26  -16.06 |
| H6’ |  | 0.07  0.94 | 0.11  0.36 | -0.19  -0.34 | -0.78  7.31 | -0.71  8.50 | 1.40  2.77 | 0.95  -2.35 | 0.51  -3.77 | 0.16  -1.56 |
| H7’ |  | -0.43  0.187 | -0.64  0.07 | 1.09  -0.07 | 4.59  1.46 | 4.11  1.7 | 2.22  1.21 | 1.51  -1.02 | 0.80  -1.64 | 0.25  -0.68 |
| H3 |  | -0.72  -2.19 | -1.09  -0.84 | 1.85  0.80 | ¨7.80  -17.11 | 7.00  -19.90 | -4.53  -3.78 | -3.08  3.20 | -1.64  5.14 | -0.52  2.13 |
| H5 |  | -0.50  -1.28 | -0.76  -0.49 | 1.29  0.46 | 5.42  -9.98 | 4.86  -11.6 | -3.24  -1.91 | -2.20  1.62 | -1.17  2.60 | -0.37  1.08 |
| H11’ |  | -0.12  -1.68 | -0.17  -0.64 | 0.30  0.61 | 1.24  -13.16 | 1.11  -15.30 | -3.12  -4.45 | -2.12  3.78 | -1.13  6.05 | -0.05  2.51 |
| H10 |  | 0.34  4.39 | 0.52  1.68 | -0.88  -1.60 | -3.69  34.31 | -3.31  39.9 | 9.83  10.53 | 6.68  -8.91 | 3.56  -14.31 | 1.12  -5.94 |
| H8 |  | -0.09  -0.54 | -0.14  -0.21 | 0.23  0.20 | 0.99  -4.21 | 0.89  -4.9 | -0.37  -2.15 | -0.25  1.82 | -0.13  2.92 | -0.04  1.21 |

**Table S3.** Computed values for the contact and dipolar shifts (ppm) according to Kemple’s method for [Ln2(LE)3]6+ in CD3CN.

|  |  | Pr | Nd | Eu | Tb | Dy |
| --- | --- | --- | --- | --- | --- | --- |
| b-CH2 |  | 1.04 | 0.47 | -0.46 | 6.84 | 7.83 |
| H4’ |  | 13.96 | 6.27 | -6.22 | 92.11 | 105.52 |
| H6’ |  | 0.71 | 0.32 | -0.31 | 4.46 | 5.33 |
| H7’ |  | -0.43  0.18 | -0.58  0.08 | 1.13  -0.08 | 5.26  1.16 | 4.19  1.33 |
| H3 |  | 0.57  -3.46 | -0.29  -1.55 | 1.15  1.54 | 13.25  -22.83 | 12.91  -26.15 |
| H5 |  | 0.87  -2.58 | -0.05  -1.16 | 0.64  1.15 | 11.64  -17.04 | 12.59  -19.52 |
| H11’ |  | -1.97 | -0.88 | 0.88 | -12.97 | -14.86 |
| H10 |  | 0.74  4.06 | 0.41  1.83 | -1.13  -1.81 | 3.81  26.83 | 5.02  30.73 |
| H8 |  | 0.64  -1.10 | 0.18  -0.50 | -0.02  0.49 | 3.35  -7.28 | 3.03  -8.34 |

**Table S4.** Uncorrected experimental 400 MHz NMR longitudinal relaxation times *T*1 (ms) for [Ln2(LE)3]6+ in CD3CN.

|  | b-CH2 | H4’ | H6’ | H7’ | H3 | H5 | H11 | H10 | H8 |
| --- | --- | --- | --- | --- | --- | --- | --- | --- | --- |
| La | 283.2 | 1626 | 709.8 | 708.2 | 707.9 | 937.8 | 541.4 | 578.7 | 564.1 |
| Pr | a | 25.5 | a | 331.5 | 149.8 | 151.6 | a | 123.0 | 324.9 |
| Yb | 119.1 | 8.37 | 188.2 | 187.0 | 75.1 | 66.7 | 139.1 | 48.3 | 178.4 |
| Lu | 250.7 | 1815 | 685.2 | 670.5 | 677.5 | 869.9 | 526.3 | 584.2 | 580.8 |

a Overlapping of some peaks prevent the *T*1 measurement.

**Table S5** Integrated and corrected relative intensities of the 5D07FJ emissions for an anhydrous sample of [Eu2(LE)3]6+ (Eu-H0)

| *T*/K | **exc/nm | *J* = 0 | *J* = 1 | *J* = 2 | *J* = 3 | *J* = 4 | *J* = 5 | *J* = 6 |
| --- | --- | --- | --- | --- | --- | --- | --- | --- |
| 10a | 400  580.78  581.10  580.50 | 0.01 | 1.00  1.00  1.00  1.00 | 1.50  1.55  1.37  1.49 | 0.04  0.05  0.03  0.06 | 0.95  1.17  1.15  1.04 | 0.02 | 0.13 |
| 295a | 400  580.52  580.25  580.90 | 0.01 | 1.00  1.00  1.00  1.00 | 1.71  0.92  1.99  1.92 | 0.04  0.04  0.04  0.03 | 1.09  1.33  1.31  1.50 |  |  |
| 295b | 396  580.47 | 0.02 | 1.00  1.00 | 1.79  1.78 | 0.05  0.05 | 1.26  1.35 |  |  |
| a Solid state. b 7·10-4 M CH3CN acetonitrile solution. | | | | | | | | |

**Figure F1** Emission spectra of the Eu-H10 and EuH0 helicates in the solid state at 10 K under different excitation conditions: (a) Eu-H0, **exc = 25 000 cm-1; (b) Eu-H0, **exc = 17 218 cm-1; (c) Eu-H10, **exc = 25 000 cm-1; (d) Eu-H10, **exc = 17 227 cm-1; (e) Eu-H10, **exc = 17 212 cm-1.
